# Supplementary material for: From Design to Screening: A New Antimicrobial Peptide Discovery Pipeline
Source: PubMed Central journal article supplement (PMC3602187; doi:10.1371/journal.pone.0059305), 2013-03-19
Supplement: pone.0059305.s002.pdf [file pone.0059305.s002.pdf]

**Table S1.** Amino acid groups used for peptide library design.

|                                 |                                                        |
|---------------------------------|--------------------------------------------------------|
| <b>Positive and Hydrophilic</b> | Lysine, Arginine, Histidine                            |
| <b>Negative and Hydrophilic</b> | Aspartic acid, Glutamic acid                           |
| <b>Polar hydrophilic</b>        | Serine, Threonine, Tyrosine, Asparagine, Glutamine     |
| <b>Hydrophobic</b>              | Valine, Leucine, Isoleucine, Methionine, Phenylalanine |
| <b>Aliphatic/Small</b>          | Glycine, Alanine                                       |
| <b>Structural (hydrophobic)</b> | Cysteine, Proline, Tryptophan                          |
