# Supplementary material for: From Design to Screening: A New Antimicrobial Peptide Discovery Pipeline
Source: PubMed Central journal article supplement (PMC3602187; doi:10.1371/journal.pone.0059305), 2013-03-19
Supplement: pone.0059305.s003.pdf [file pone.0059305.s003.pdf]

**Table S2.** Primer sequences used in this study.

| <b>Primer</b>                | <b>Sequence (5' - 3')</b>                                              |
|------------------------------|------------------------------------------------------------------------|
| Forward Primer- Library Amp. | GCATCATAGACATAGTCAGGCATAGAGGATCCAAGCTTCT                               |
| Reverse Primer- Library Amp. | GCAATACGTTAGCGTTCATGGCCGTAGCTCAGAAATTCTTA                              |
| Forward Primer-MID 3-Group L | CCATCTCATCCCTGCGTGTCTCCGACTCAG <b>ACACTACTCGT</b> CTACCGTTGCGCAAGCTTCT |
| Forward Primer-MID 4-Group E | CCATCTCATCCCTGCGTGTCTCCGACTCAG <b>ACGACACGTAT</b> CTACCGTTGCGCAAGCTTCT |
| Forward Primer-MID 5-Group H | CCATCTCATCCCTGCGTGTCTCCGACTCAG <b>ACGAGTAGACT</b> CTACCGTTGCGCAAGCTTCT |
| Reverse Primer-Sequencing    | CCTATCCCCTGTGTGCCTTGGCAGTCTCAGATCTGGTACCCGGGAATTCTTA                   |

Restriction sites are shown in italics and MID tags are shown in bold.
